# Supplementary material for: Abnormal Expression of ERα in Cholangiocytes of Patients With Primary Biliary Cholangitis Mediated Intrahepatic Bile Duct Inflammation
Source: PubMed Central journal article supplement (PMC6907097; doi:10.3389/fimmu.2019.02815), 2019-12-05
Supplement: Data_Sheet_1.pdf [file Data_Sheet_1.pdf]

## Supplemental Materials

**Table1.** Characteristics of PBC patients and Healthy Controls.

|                                                                     | PBC                   | HC                    |
|---------------------------------------------------------------------|-----------------------|-----------------------|
| Age (yrs)<br>Mean±SD                                                | 58.71±11.68           | 56.87±4.58            |
| ALT(U/L)<br>Median(P <sub>25</sub> ,P <sub>75</sub> )               | 28.00(16.00,56.00)    | NA                    |
| AST(U/L)<br>Median(P <sub>25</sub> ,P <sub>75</sub> )               | 39.00(29.00,68.50)    | NA                    |
| GGT (U/L) <sup>a</sup><br>Median(P <sub>25</sub> ,P <sub>75</sub> ) | 131.00(64.00,200.00)  | NA                    |
| AKP (U/L) <sup>a</sup><br>Mean±SD                                   | 195.29±72.34          | NA                    |
| TBiL (umol/L)<br>Median(P <sub>25</sub> ,P <sub>75</sub> )          | 13.20(10.15,28.65)    | NA                    |
| IL-6(pg/mL)<br>Median(P <sub>25</sub> ,P <sub>75</sub> )            | 7.15(6.15,7.67)       | 5.31(4.81,5.71)       |
| IL-8(pg/mL)<br>Median(P <sub>25</sub> ,P <sub>75</sub> )            | 13.81(12.98,15.06)    | 10.05(9.37,11.06)     |
| TNF-α(pg/mL)<br>Median(P <sub>25</sub> ,P <sub>75</sub> )           | 6.62(8.54,10.62)      | 9.84(5.74,7.43)       |
| IL-22(pg/mL)<br>Median(P <sub>25</sub> ,P <sub>75</sub> )           | 35.09(31.93,38.81)    | 27.28(24.96,29.51)    |
| IFN-γ(pg/mL)<br>Median(P <sub>25</sub> ,P <sub>75</sub> )           | 95.86(87.93,102.31)   | 77.52(70.82,85.20)    |
| TGF-β(pg/mL)<br>Median(P <sub>25</sub> ,P <sub>75</sub> )           | 536.19(499.67,581.41) | 423.16(397.07,472.72) |
| VEGF(pg/mL)<br>Median(P <sub>25</sub> ,P <sub>75</sub> )            | 38.01(34.84,40.63)    | 26.98(25.53,28.43)    |

**a**, the normal range of alkaline phosphatase is 45-125U/L,g-glutamyl transpeptidase is 10-60U/L in our hospital. NA,not applicable. ALT: Alanine aminotransferase; AST: Aspartate transaminase; γ-GT: G-glutamyl transpeptidase; TBiL: Total bilirubin; IL-6: Interleukin-6; IL-8: Interleukin-8; TNF-α: Tumor necrosis factor-alpha;IL-22:Interleukin-22;IFN-γ:Interferon gamma; TGF-β: Transforming growth factor-beta; VEGF: Vascular endothelial growth factor.

**Table 2.** List of Primers Used in Real-Time PCR

| Gene Name       |         | Sequence                 | Real-time PCR product size |
|-----------------|---------|--------------------------|----------------------------|
| hIL-6           | Forward | AAAGCAGCAAAGAGGCACTG     | 137bp                      |
|                 | Reverse | TACCTCAAACCTCCAAAAGACCAG |                            |
| hIL-8           | Forward | GACATACTCCAAACCTTTCCACC  | 162bp                      |
|                 | Reverse | AACTTCTCCCACAACCCTCTGC   |                            |
| hTNF- $\alpha$  | Forward | CACGCTCTTTCTCTGCCTGCTG   | 129bp                      |
|                 | Reverse | GGCTTGTCGGGGTTC          |                            |
| hER $\alpha$    | Forward | CCAGGCTTTGTGGATTTGAC     | 147bp                      |
|                 | Reverse | G TTCCTGTCCAAGAGCAAGTTAG |                            |
| hER $\beta$     | Forward | TCTCCTTTAGTGGTCCATCGC    | 181bp                      |
|                 | Reverse | GAGCATCCCTCTTTGAACCTG    |                            |
| $\beta$ -actine | Forward | ACCACCATGTACCCTGGACT     | 103bp                      |
|                 | Reverse | TTGTTTTCTGCGCAAGTTAGGT   |                            |

bp, base pair; h, human

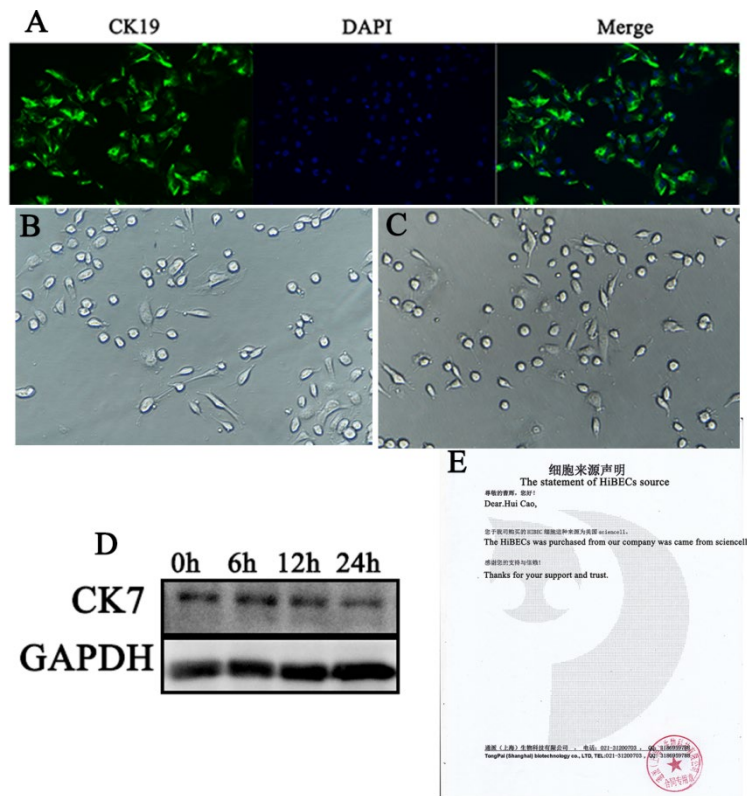

**Figure1:** (A-E): HiBECs identification. **A.** Immunofluorescence was used to detect the ck19 expression; **B.** Immunoblotting was used to detect the ck7 expression; **B-C.** The morphology of HiBECs was observed by optical microscope; **E.** Certificate was provided by tongpai biotechnology co., LTD.

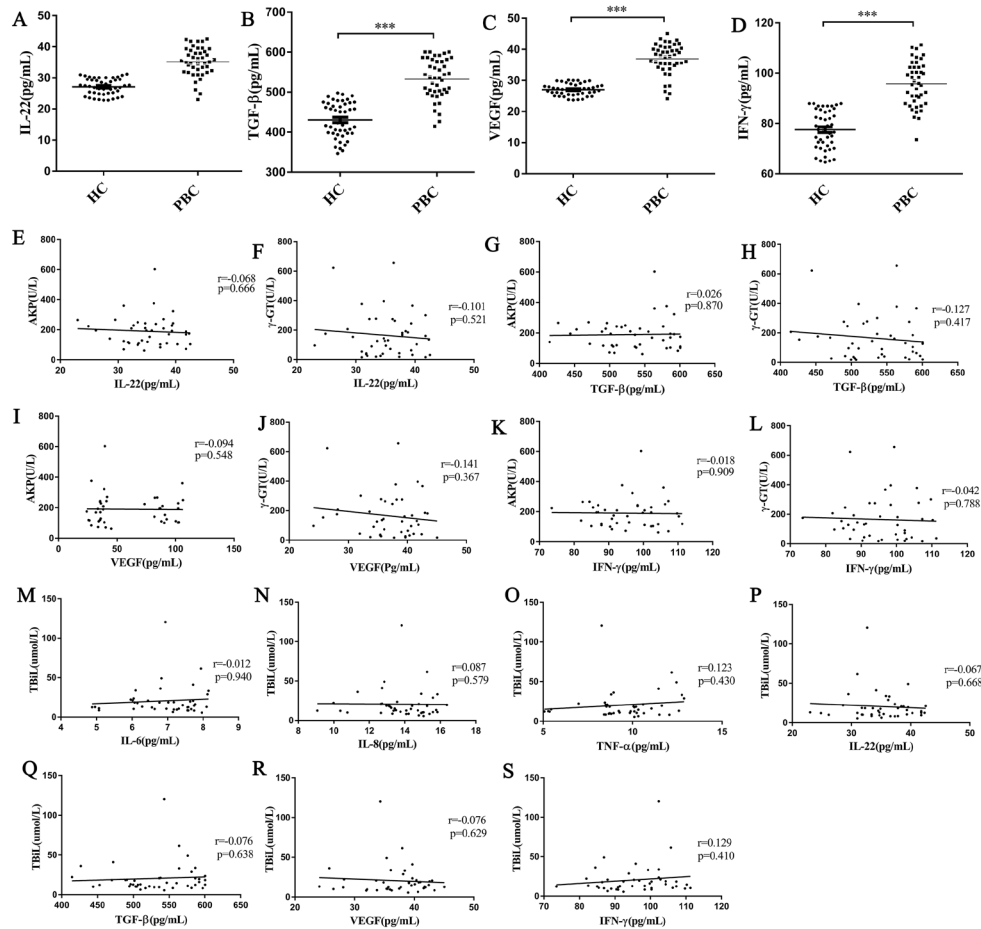

**Figure 2:** Serum levels of cytokines and correlation with AKP and  $\gamma$ -GT and TBIl. **(A-D):** Serum levels of IL-22(A), TGF- $\beta$ (B), VEGF(C) and IFN- $\gamma$ (D) in PBC patients (n=43) and HC(n=45), \*\*\*P <0.001, compared with HC by a Mann-Whitney test. Data are represented as median with interquartile range **(E-L):** Serum IL-22, TGF- $\beta$ , VEGF and IFN- $\gamma$  concentration with the levels of AKP and  $\gamma$ -GT in PBC patients(n=43). **(M-S):** Serum IL-6, IL-8, TNF- $\alpha$ , IL-22, TGF- $\beta$ , VEGF and IFN- $\gamma$  concentration with the levels of TBIl in PBC patients (n=43). The p values were determined by Spearman's rank correlation, P<0.05 was considered significant. PBC, primary biliary cirrhosis; HC: healthy control; IL-6, interleukin-6; IL-8, interleukin-8; TNF- $\alpha$ , tumor necrosis factor-alpha; AKP, Alkaline phosphatase; GGT, g-glutamyl transpeptidase; IL-22: Interleukin-22; IFN- $\gamma$ : Interferon gamma; TGF- $\beta$ : Transforming growth factor-beta; VEGF: Vascular endothelial growth factor.

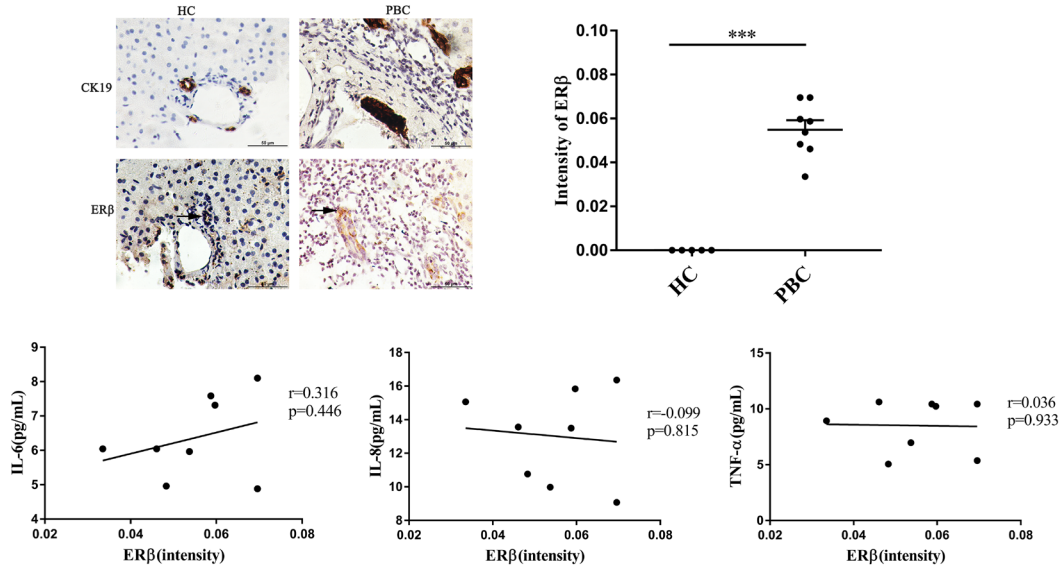

**Figure3:** ERβ expression in liver biopsies of PBC patients and HC. ERβ expression in small bile duct of PBC patients (upper right panel) were higher than HC (lower right panel)(original magnification, ×400), However,the expression levels of ERβ have not a linear relationship with the levels of cytokines.

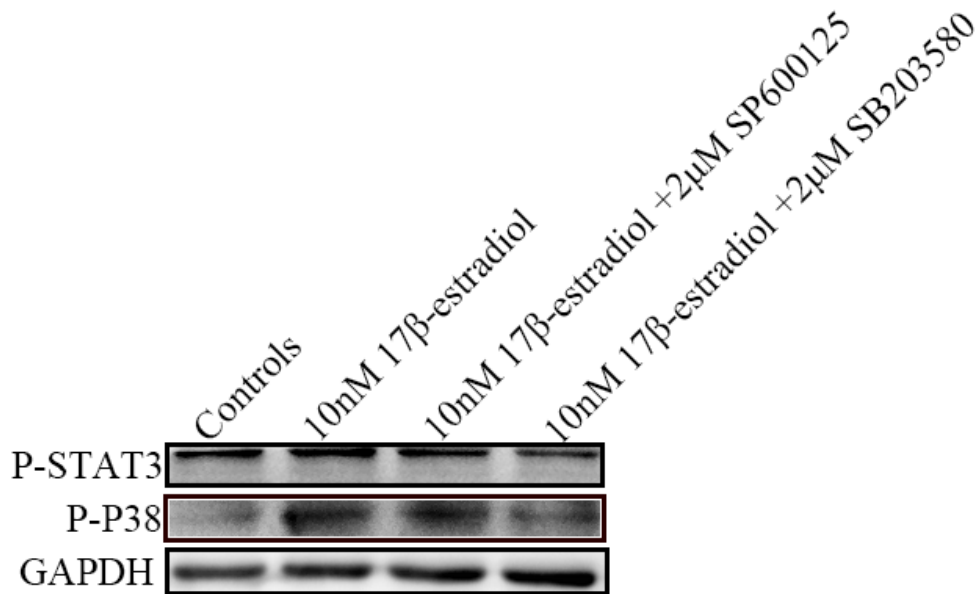

**Figure4:** *In vitro*, SB203580 can block STAT3 activation, which should be up-regulated in HiBECs by treated with 17β-estradiol.

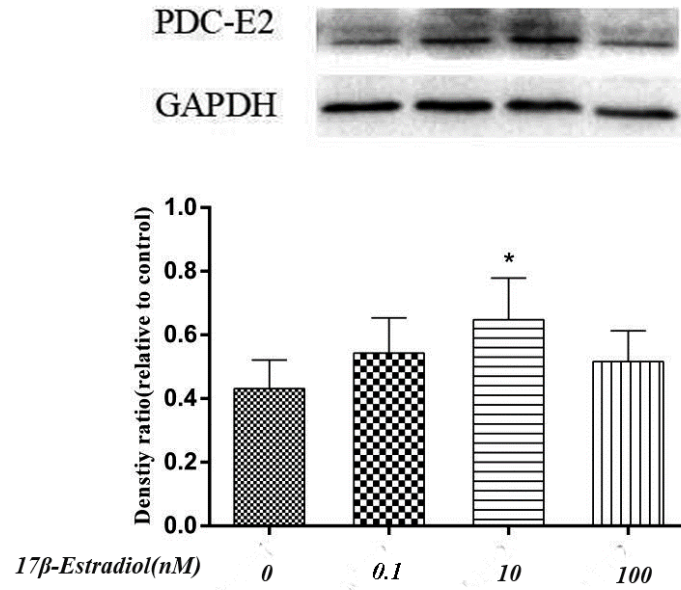

**Figure5:** *In vitro* 17β-estradiol promoted PDC-E2 expression in HiBECs. HiBECs were treated with 3 concentrations of 17β-estradiol(0.1nM,10nM and 100nM) for 48h. Immunoblotting analysis of PDC-E2 expression in HiBECs. 10nM 17β-estradiol had significantly induced PDC-E2 expression, \*p< 0.05 compared with controls by Student t test.

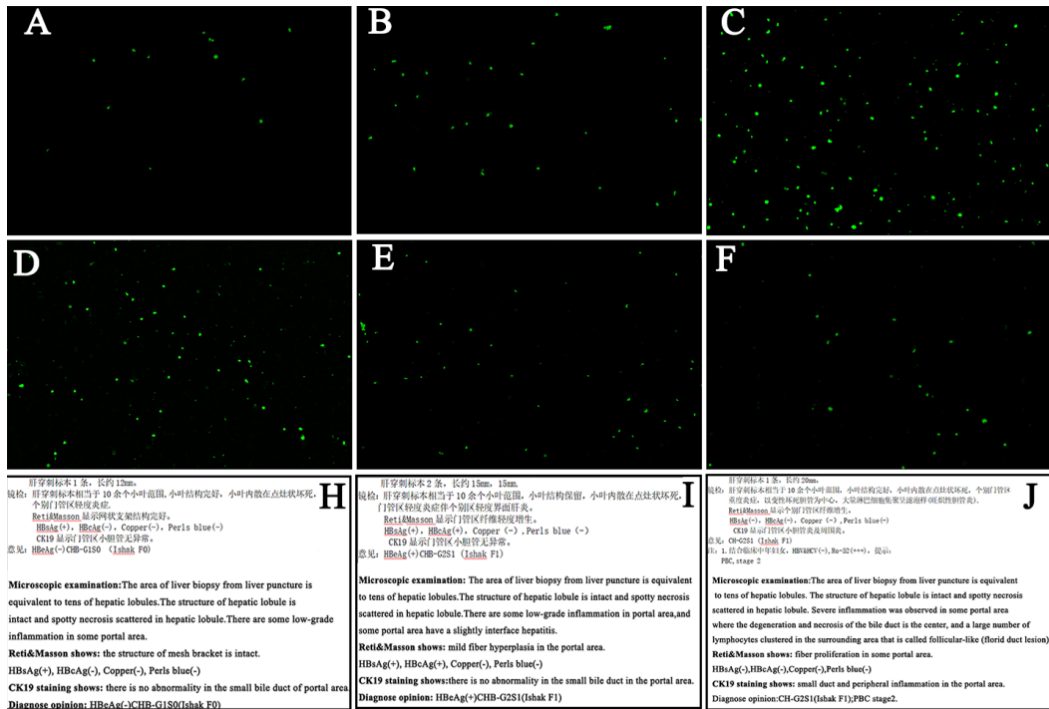

**Figure6:** PBMCs adhere to HiBECs and the results of liver pathological of three patients. **(A-C):** PBMCs were extracted from 10mL peripheral blood of PBC patients(n=1) and CHB patients (n=2).Meanwhile, HiBECs were also isolated from those patients. PBMCs were stimulated with 10 mg/mL phytohemagglutinin for 72h. Then, BCECF-AM was added to PBMCs for 1h and co-cultured with HiBECs. **A:** PBMCs and HiBECs from CHB patient;**B:** PBMCs and HiBECs from CHB patient 2; **C:**PBMCs and HiBECs from PBC patient. **(D-F):** Fulvestrant was added to HiBECs which was isolated from PBC patient for 12h **(D)**, 24h**(E)** and 48h**(F)**. **(H-J)**.The results of liver pathological of two CHB patients **(A:** patient 1; **B:** patient 2) and PBC patient**(J)**.
